# Supplementary material for: Highly Pathogenic Avian Influenza Clade 2.3.4.4b Subtype H5N8 Virus Isolated from Mandarin Duck in South Korea, 2020
Source: MDPI journal article supplement (doi:10.3390/v12121389), 2020-12-04
Supplement: s1 [file s1]

**Supplementary Table S1:** Viruses on which this research is based and the submitters. We would like to thank the research groups that contributed sequence data to the Epiflu Database at GISAID and NCBI's Influenza Virus Resources at GenBank.

| Isolate ID/Accession No. | Isolate Name                                         | Submitting Laboratory                                        |
|--------------------------|------------------------------------------------------|--------------------------------------------------------------|
| EPI ISL 405278           | A/guinea fowl/Nigeria/OG-GF11T 19VIR8424-7/2019 H5N8 | Istituto Zooprofilattico Sperimentale Delle Venezie          |
| EPI ISL 285653           | A/Pigeon/South Africa/S2017/08 0323 P1/2017          | National Institute for Communicable Diseases                 |
| EPI ISL 285650           | A/Ostrich/South Africa/S2017/08 0046 AF/2017         | National Institute for Communicable Diseases                 |
| EPI ISL 285609           | A/Geese/South Africa/S2017/08 0558 P2/2017           | National Institute for Communicable Diseases                 |
| EPI ISL 285602           | A/Geese/South Africa/S2017/09 0065 P2/2017           | National Institute for Communicable Diseases                 |
| EPI ISL 285917           | A/Chicken/South Africa/S2017/09 0184 62/2017         | National Institute for Communicable Diseases                 |
| EPI ISL 285918           | A/Ostrich/South Africa/S2017/08 0362 P8 34/2017      | National Institute for Communicable Diseases                 |
| EPI ISL 285948           | A/Swan/South Africa/S2017/08 0517 P1/2017            | National Institute for Communicable Diseases                 |
| EPI ISL 285610           | A/Guineafowl/South Africa/S2017/08 0274 P1/2017      | National Institute for Communicable Diseases                 |
| EPI ISL 400491           | A/Whooper swan/Shanxi/7/2016                         | Harbin Veterinary Research Institute (CAAS)                  |
| EPI ISL 292479           | A/Bar-headed Goose/Qinghai/a893/2017                 | Wuhan Institute of Virology                                  |
| EPI ISL 404993           | A/white-fronted goose/Germany-BB/AI00018/2020        | Friedrich-Loeffler-Institut                                  |
| EPI ISL 418266           | A/turkey/Czech Republic/3071/2020                    | State Veterinary Institute Prague                            |
| EPI ISL 402134           | A/turkey/Poland/23/2019                              | National Veterinary Research Institut Poland, PIWet-PIB      |
| EPI ISL 525440           | A/chicken/Poland/003/2020                            | National Veterinary Research Institut Poland, PIWet-PIB      |
| EPI ISL 419220           | A/turkey/Hungary/1020 20VIR749-1/2020                | Istituto Zooprofilattico Sperimentale Delle Venezie          |
| EPI ISL 419314           | A/turkey/Germany-ST/AI00352/2020                     | Friedrich-Loeffler-Institut                                  |
| EPI ISL 419239           | A/duck/Hungary/1565 20VIR749-2/2020                  | Istituto Zooprofilattico Sperimentale Delle Venezie          |
| EPI ISL 405391           | A/chicken/Czech Republic/1175-1/2020                 | State Veterinary Institute Prague                            |
| EPI ISL 417414           | A/buzzard/Germany-SN/AI00285/2020                    | Friedrich-Loeffler-Institut                                  |
| EPI ISL 415197           | A/chicken/Germany-SN/AI00276/2020                    | Friedrich-Loeffler-Institut                                  |
| EPI ISL 417415           | A/turkey/Germany-NI/AI00334/2020                     | Friedrich-Loeffler-Institut                                  |
| EPI ISL 419312           | A/steamer duck/Germany-SN/AI00346/2020               | Friedrich-Loeffler-Institut                                  |
| EPI ISL 410291           | A/chicken/Germany-BW/AI00049/2020                    | Friedrich-Loeffler-Institut                                  |
| EPI ISL 525463           | A/domestic duck/Poland/285/2020                      | National Veterinary Research Institut Poland, PIWet-PIB      |
| EPI ISL 525465           | A/domestic duck/Poland/271/2020                      | National Veterinary Research Institut Poland, PIWet-PIB      |
| EPI ISL 525447           | A/turkey/Poland/096/2020                             | National Veterinary Research Institut Poland, PIWet-PIB      |
| EPI ISL 525439           | A/laying hen/Poland/002/2020                         | National Veterinary Research Institut Poland, PIWet-PIB      |
| EPI ISL 525448           | A/turkey/Poland/182/2020                             | National Veterinary Research Institut Poland, PIWet-PIB      |
| EPI ISL 525444           | A/chicken/Poland/054/2020                            | National Veterinary Research Institut Poland, PIWet-PIB      |
| EPI ISL 525452           | A/domestic duck/Poland/223/2020                      | National Veterinary Research Institut Poland, PIWet-PIB      |
| EPI ISL 525443           | A/domestic goose/Poland/028/2020                     | National Veterinary Research Institut Poland, PIWet-PIB      |
| EPI ISL 525449           | A/domestic duck/Poland/219/2020                      | National Veterinary Research Institut Poland, PIWet-PIB      |
| EPI ISL 240678           | A/domestic duck/Siberia/50K/2016                     | Research Institute of Experimental and Clinical Medicine     |
| EPI ISL 240677           | A/domestic duck/Siberia/103/2016                     | Research Institute of Experimental and Clinical Medicine     |
| EPI ISL 288439           | A/chicken/Korea/Gimje2/2017                          | Animal and Plant Quarantine Agency (S-2145)                  |
| EPI ISL 288438           | A/chicken/Korea/Gunsan/2017                          | Animal and Plant Quarantine Agency (S-2145)                  |
| EPI ISL 247721           | A/turkey/Rostov-on-Don/11/2017                       | State Research Center of Virology and Biotechnology (VECTOR) |
| EPI ISL 254725           | A/chicken/Korea/H903/2017                            | Animal and Plant Quarantine Agency (S-2026)                  |
| EPI ISL 237554           | A/painted stork/India/10CA03/2016                    | ICAR-National Institute of High Security Animal Diseases     |
| EPI ISL 255182           | A/turkey/Italy/17VIR538-1/2017                       | Istituto Zooprofilattico Sperimentale Delle Venezie          |
| EPI ISL 241249           | A/domestic duck/Germany-MV/R9869/2016                | Friedrich-Loeffler-Institut                                  |
| EPI ISL 249691           | A/chicken/Germany-MV/R10048/2016                     | Friedrich-Loeffler-Institut                                  |
| EPI ISL 237921           | A/wild duck/Poland/82A/2016                          | National Veterinary Research Institut Poland, PIWet-PIB      |
| EPI ISL 262059           | A/greylag goose/Germany-NI/AR703-L02138/2017         | Friedrich-Loeffler-Institut                                  |
| EPI ISL 237730           | A/mute swan/Hungary/51049/2016                       | Danam.Vet.Molbiol                                            |
| EPI ISL 261687           | A/black swan/Germany-BW/R1364/2017                   | Friedrich-Loeffler-Institut                                  |
| EPI ISL 238196           | A/mute swan/Croatia/70/2016                          | Croatian Veterinary Institute                                |
| EPI ISL 262058           | A/greylag goose/Germany-NI/AR1395-L02144/2017        | Friedrich-Loeffler-Institut                                  |
| EPI ISL 247429           | A/domestic duck/Germany-BB/R681ff/2017               | Friedrich-Loeffler-Institut                                  |
| EPI ISL 247724           | A/wild duck/Tatarstan/3059/2016                      | State Research Center of Virology and Biotechnology (VECTOR) |

|                |                                                 |                                                              |
|----------------|-------------------------------------------------|--------------------------------------------------------------|
| EPI ISL 249682 | A/domestic goose/Germany-BY/R677/2017           | Friedrich-Loeffler-Institut                                  |
| EPI ISL 243085 | A/wigeon/Italy/16VIR9616-3/2016                 | Istituto Zooprofilattico Sperimentale Delle Venezie          |
| EPI ISL 259074 | A/common buzzard/Germany-SN/R1117/2017          | Friedrich-Loeffler-Institut                                  |
| EPI ISL 240101 | A/mute swan/Croatia/102/2016                    | Croatian Veterinary Institute                                |
| EPI ISL 256301 | A/environment/Kamchatka/18/2016                 | State Research Center of Virology and Biotechnology (VECTOR) |
| EPI ISL 259525 | A/egret/Germany-SH/R1459/2017                   | Friedrich-Loeffler-Institut                                  |
| EPI ISL 260059 | A/cormorant/Germany-SH/R896/2017                | Friedrich-Loeffler-Institut                                  |
| EPI ISL 255917 | A/mute swan/Poland/64/2017                      | National Veterinary Research Institut Poland, PIWet-PIB      |
| EPI ISL 243049 | A/turkey/Germany-SH/R425/2017                   | Friedrich-Loeffler-Institut                                  |
| EPI ISL 260058 | A/grey heron/Germany-SN/R572/2017               | Friedrich-Loeffler-Institut                                  |
| EPI ISL 256462 | A/Mute swan/Hungary/5879/2017                   | Danam. Vet. Molbiol                                          |
| EPI ISL 335457 | A/mute swan/Shimane/3211A002/2017               | National Institute of Animal Health                          |
| EPI ISL 287800 | A/spoonbill/Taiwan/DB645/2017                   | Animal Health Research Institute                             |
| EPI ISL 288437 | A/duck/Korea/HD1/2017                           | Animal and Plant Quarantine Agency (S-2145)                  |
| EPI ISL 335450 | A/chicken/Korea/H214/2018                       | Animal and Plant Quarantine Agency (S-2158)                  |
| EPI ISL 292345 | A/duck/Korea/H35/2017                           | Animal and Plant Quarantine Agency (S-2145)                  |
| EPI ISL 335456 | A/spotbill duck/Korea/WA159/2018                | Animal and Plant Quarantine Agency (S-2158)                  |
| EPI ISL 335448 | A/chicken/Korea/H203/2018                       | Animal and Plant Quarantine Agency (S-2158)                  |
| EPI ISL 335440 | A/mandarin duck/Korea/H119-4/2017               | Animal and Plant Quarantine Agency (S-2158)                  |
| EPI ISL 335468 | A/Jungle crow/Hyogo/2803E024C/2018              | National Institute of Animal Health                          |
| EPI ISL 289713 | A/Great Black-backed Gull/Netherlands/1/2017    | Erasmus Medical Center                                       |
| EPI ISL 288362 | A/chicken/Greece/39 2017/2017                   | Animal and Plant Health Agency (APHA)                        |
| EPI ISL 291109 | A/common pochard/Germany-BY/AR09-18-L02421/2017 | Friedrich-Loeffler-Institut                                  |
| EPI ISL 287907 | A/Duck/Netherlands/17017237-001-005/2017        | Wageningen Bioveterinary Research                            |
| EPI ISL 289714 | A/Black-headed Gull/Netherlands/29/2017         | Erasmus Medical Center                                       |
| EPI ISL 292225 | A/canada goose/England/AV58 18OPpoolEP1/2018    | Animal and Plant Health Agency (APHA)                        |
| EPI ISL 166693 | A/duck/Beijing/FS01/2014                        | Institute of Microbiology, Chinese Academy of Sciences       |
| EPI ISL 603133 | A/Eurasian Wigeon/Netherlands/1/2020            | Erasmus Medical Center                                       |
| EPI ISL 603134 | A/Eurasian Wigeon/Netherlands/4/2020            | Erasmus Medical Center                                       |
| EPI ISL 603135 | A/Eurasian Wigeon/Netherlands/5/2020            | Erasmus Medical Center                                       |
| EPI ISL 408826 | A/Korean native chicken/Korea/H2098/2015        | Animal and Plant Quarantine Agency (S-2158)                  |
| EPI ISL 418181 | A/Whooper swan/Xinjiang/13/2020                 | Harbin Veterinary Research Institute (CAAS)                  |
| EPI ISL 418171 | A/Whooper swan/Xinjiang/3/2020                  | Harbin Veterinary Research Institute (CAAS)                  |
| EPI ISL 418169 | A/Whooper swan/Xinjiang/1/2020                  | Harbin Veterinary Research Institute (CAAS)                  |
| EPI ISL 337274 | A/Guangdong/18SF020/2018                        | WHO Chinese National Influenza Center                        |
| EPI ISL 404208 | A/duck/Nghe An/5382VTC/2019                     | State Research Center of Virology and Biotechnology (VECTOR) |
| EPI ISL 404987 | A/chicken/Dong Nai/25437VTC/2019                | State Research Center of Virology and Biotechnology (VECTOR) |
| EPI ISL 389023 | A/chicken/Nghe An/02VTC/2018                    | State Research Center of Virology and Biotechnology (VECTOR) |
| EPI ISL 353618 | A/Chicken/Suzhou/j6/2019                        | Jiangsu Provincial Center for Disease Control & Prevention   |
| EPI ISL 389145 | A/chicken/Nghe An/27VTC/2018                    | State Research Center of Virology and Biotechnology (VECTOR) |
| EPI ISL 224580 | A/great crested grebe/Uvs-Nuur Lake/341/2016    | Research Institute of Experimental and Clinical Medicine     |
| EPI ISL 234058 | A/common tern /Uvs-Nuur Lake/26/2016            | Research Institute of Experimental and Clinical Medicine     |
| EPI ISL 230820 | A/great crested grebe/Tyva/34/2016              | WHO National Influenza Centre Russian Federation             |
| EPI ISL 224704 | A/Bar-headed Goose/Qinghai/BTY1-B/2016          | Wuhan Institute of Virology                                  |
| EPI ISL 224709 | A/Bar-headed Goose/Qinghai/BTY3-B/2016          | Wuhan Institute of Virology                                  |
| EPI ISL 224721 | A/Bar-headed Goose/Qinghai/BTY9-B/2016          | Wuhan Institute of Virology                                  |
| EPI ISL 224729 | A/Bar-headed Goose/Qinghai/BTY13-B/2016         | Wuhan Institute of Virology                                  |
| EPI ISL 224751 | A/Brown-headed Gull/Qinghai/ZTO6-MU/2016        | Wuhan Institute of Virology                                  |
| EPI ISL 292497 | A/Bar-headed Goose/Qinghai/XX1122/2016          | Wuhan Institute of Virology                                  |
| EPI ISL 336925 | A/common gull/Saratov/1676/2018                 | State Research Center of Virology and Biotechnology (VECTOR) |
| EPI ISL 292192 | A/Bar-headed Goose/Qinghai/A23/2016             | Wuhan Institute of Virology                                  |
| EPI ISL 292187 | A/Bar-headed Goose/Qinghai/XX782/2016           | Wuhan Institute of Virology                                  |
| EPI ISL 292333 | A/Water/Qinghai/i40-44/2016                     | Wuhan Institute of Virology                                  |
| EPI ISL 250231 | A/domestic duck/Siberia/49 feather/2016         | WHO National Influenza Centre Russian Federation             |
| EPI ISL 248634 | A/duck/Taiwan/1702004/2017                      | Animal Health Research Institute                             |
| EPI ISL 239351 | A/duck/Hyogo/1/2016                             | National Institute of Infectious Diseases (NIID)             |

|                 |                                                          |                                                              |
|-----------------|----------------------------------------------------------|--------------------------------------------------------------|
| EPI ISL 239261  | A/chicken/Korea/HN1/2016(H5N6)                           | Animal and Plant Quarantine Agency (S-2026)                  |
| EPI ISL 278031  | A/Quail/Zhanjiang/16887/2016                             | South China Agricultural University                          |
| EPI ISL 239267  | A/mandarin duck/Korea/T102-1/2016(H5N6)                  | Animal and Plant Quarantine Agency (S-2026)                  |
| EPI ISL 239263  | A/duck/Korea/H15/2016(H5N6)                              | Animal and Plant Quarantine Agency (S-2026)                  |
| EPI ISL 400492  | A/Greylag goose/Hunan/1/2017                             | Harbin Veterinary Research Institute (CAAS)                  |
| EPI ISL 283970  | A/Ostrich/Guangxi/GX-1/2017 (H5N6)                       | South China Agricultural University                          |
| EPI ISL 240703  | A/Hunan/55555/2016                                       | WHO Chinese National Influenza Center                        |
| EPI ISL 240533  | A/muscovy duck/Aomori/1-7T/2016                          | National Institute of Animal Health                          |
| EPI ISL 239271  | A/spot billed duck/Korea/WB141/2016(H5N6)                | Animal and Plant Quarantine Agency (S-2026)                  |
| EPI ISL 239262  | A/duck/Korea/ES2/2016(H5N6)                              | Animal and Plant Quarantine Agency (S-2026)                  |
| EPI ISL 239269  | A/mandarin duck/Korea/WB246/2016(H5N6)                   | Animal and Plant Quarantine Agency (S-2026)                  |
| EPI ISL 239266  | A/Eurasian eagle owl/Korea/960/2016(H5N6)                | Animal and Plant Quarantine Agency (S-2026)                  |
| EPI ISL 389082  | A/chicken/Nghe An/14VTC/2015                             | State Research Center of Virology and Biotechnology (VECTOR) |
| EPI ISL 219800  | A/Environment/Guangxi/42586/2015                         | WHO Chinese National Influenza Center                        |
| EPI ISL 400489  | A/Whooper Swan/Hunan/4/2016                              | Harbin Veterinary Research Institute (CAAS)                  |
| EPI ISL 163493  | A/Sichuan/26221/2014                                     | WHO Chinese National Influenza Center                        |
| EPI ISL 389290  | A/chicken/Ha Tinh/73VTC/2017                             | State Research Center of Virology and Biotechnology (VECTOR) |
| EPI ISL 219813  | A/Environment/Guangdong/33311/2015                       | WHO Chinese National Influenza Center                        |
| EPI ISL 333634  | A/Environment/Fujian/28686/2016                          | Fujian Center for Disease Control and Prevention             |
| EPI ISL 400486  | A/Common pheasant/Hunan/11/2015                          | Harbin Veterinary Research Institute (CAAS)                  |
| EPI ISL 205314  | A/Environment/Shenzhen/1/2015                            | WHO Chinese National Influenza Center                        |
| EPI ISL 219808  | A/Environment/Guangdong/40113/2015                       | WHO Chinese National Influenza Center                        |
| EPI ISL 284650  | A/Anhui/33162/2016                                       | WHO Chinese National Influenza Center                        |
| EPI ISL 333975  | A/chicken/Vietnam/NCVD-16A26/2016                        | Centers for Disease Control and Prevention                   |
| EPI ISL 137254  | A/duck/Hebei/2/2011                                      | Institute of Microbiology, Chinese Academy of Sciences       |
| EPI ISL 24603   | A/Anhui/1/2005                                           | WHO Chinese National Influenza Center                        |
| EPI ISL 332682  | A/teal/Toguchin/1157/2016                                | State Research Center of Virology and Biotechnology (VECTOR) |
| EPI ISL 462612  | A/mallard/Anhui/3-617/2019                               | Harbin Veterinary Research Institute (CAAS)                  |
| EPI ISL 331295  | A/teal/Chany/324/2017                                    | Research Institute of Experimental and Clinical Medicine     |
| EPI ISL 333615  | A/gadwall/Chany/893/2018                                 | State Research Center of Virology and Biotechnology (VECTOR) |
| EPI ISL 355938  | A/green sandpiper/Kurgan/1050/2018                       | State Research Center of Virology and Biotechnology (VECTOR) |
| EPI ISL 331307  | A/teal/Dagestan/1017/2018                                | Research Institute of Experimental and Clinical Medicine     |
| EPI ISL 250237  | A/mallard/Chany/355/2016                                 | WHO National Influenza Centre Russian Federation             |
| EPI ISL 331306  | A/shoveler/Ubinskoe Lake/43/2017                         | Research Institute of Experimental and Clinical Medicine     |
| EPI ISL 250238  | A/gadwall/Chany/97/2016                                  | WHO National Influenza Centre Russian Federation             |
| EPI ISL 237148  | A/duck/Okinawa/471017/2015                               | National Institute of Animal Health                          |
| EPI ISL 333132  | A/goose/Bangladesh/19D820/2017                           | Centers for Disease Control and Prevention                   |
| EPI ISL 400550  | A/Peacock/Hunan/15/2015                                  | Harbin Veterinary Research Institute (CAAS)                  |
| EPI ISL 400485  | A/Green pheasant/Hunan/10/2015                           | Harbin Veterinary Research Institute (CAAS)                  |
| EPI ISL 237987  | A/gyrfalcon/Washington/41088/6/2014                      | National Institute of Animal Health                          |
| EPI ISL 167904  | A/duck/England/36254/14                                  | Animal and Plant Health Agency (APHA)                        |
| EPI ISL 292340  | A/Bar-headed Goose/Qinghai/a230/2017                     | Wuhan Institute of Virology                                  |
| EPI ISL 292476  | A/Bar-headed Goose/Qinghai/a237/2017                     | Wuhan Institute of Virology                                  |
| EPI ISL 292335  | A/water/Qinghai/XXII2871/2017                            | Wuhan Institute of Virology                                  |
| EPI ISL 292477  | A/Great Crested Grebe/Qinghai/a737/2017                  | Wuhan Institute of Virology                                  |
| EPI ISL 292478  | A/Bar-headed Goose/Qinghai/a765/2017                     | Wuhan Institute of Virology                                  |
| EPI ISL 168075  | A/chicken/Netherlands/14015531/2014                      | Wageningen Bioveterinary Research                            |
| EPI ISL 172815  | A/ibis/Germany-MV/R44/2015                               | Friedrich-Loeffler-Institut                                  |
| EPI ISL 169351  | A/turkey/Germany-NI/R3372/2014                           | Friedrich-Loeffler-Institut                                  |
| MT872354-872361 | A/Whooper swan/Mongolia/24/2020                          | Konkuk University                                            |
| MT872362-872369 | A/Whooper swan/Mongolia/25/2020                          | Konkuk University                                            |
| MT027083-027090 | A/layer hen/Slovakia/A-chicken-Slovakia-Pah 14-2020/2020 | Veterinary Institute Zvolen                                  |
| MT126633-126637 | A/garganey/North Kazakhstan/45/2018                      | Research Institute for Biological Safety Problems (RIBSP)    |
